# Supplementary material for: Beyond Abandonment to Next Steps: Understanding and Designing for Life after Personal Informatics Tool Use
Source: PubMed Central journal article supplement (PMC5428074; doi:10.1145/2858036.2858045), 2016-05
Supplement: NIHMS855559-supplement-Appendix__First_follow_up_survey.pdf [file NIHMS855559-supplement-Appendix__First_follow_up_survey.pdf]

# Physical activity follow-up

---

**Thank you for taking part in our follow-up survey! This survey only has one page, and you will receive a code to paste into Mechanical Turk upon its completion.**

**1) Which of the following tools did you use to track your physical activity?\***

Fitbit

Jawbone Up

Nike Fuel Band

MapMyRun

RunKeeper

Apple HealthKit

Myfitnesspal

Google fit

Other wearable devices: \_\_\_\_\_

Other phone apps: \_\_\_\_\_

**2) In total, how long did you track your physical activity for?\***

Less than one week

1 week - 1 month

1-3 months

3-6 months

6 months - 1 year

1-2 years

more than 2 years

I don't remember

**3) How long ago did you stop tracking?\***

- Less than one week ago
- 1 week - 1 month ago
- 1-3 months ago
- 3-6 months ago
- 6 months - 1 year ago
- 1-2 years ago
- more than 2 years ago
- I don't remember

**4) Which of the following is most true for you?\***

- Before I started tracking, I did not know if I wanted to change my behavior.
- Before I started tracking, I wanted to maintain my current behavior or I did not want to change my behavior.
- Before I started tracking, I wanted to change my behavior and did not have a plan for how to do so.
- Before I started tracking, I wanted to change my behavior and had a plan for how to do so.

**5) Why did you stop tracking?\***

---

---

---

---

**6) What about your tracking experience did you find *frustrating*?\***

---

---

---

---

**7) At the time you decided to stop tracking, how did you feel about this decision? Why?\***

---

---

---

---

**8) How do you feel *now* about your decision to stop tracking? Why?\***

---

---

---

---

**9) Do you ever think about trying to track again? What would or would not make you want to return to tracking?\***

---

---

---

---

**10) How do you think your habits have changed since you stopped tracking? Do you think you are more, less, or about as physically active?\***

---

---

---

---

**11) How old are you?**

---

**12) What gender do you identify as?**

---

---

**Thank You!**

**Thank you for taking our survey! Please write down or copy-and-paste the following code into Amazon Mechanical Turk:**

`[survey("session id")]`

---
